# Supplementary material for: Network-based analysis of transcriptional profiles from chemical perturbations experiments
Source: PubMed Central journal article supplement (PMC5374700; doi:10.1186/s12859-017-1536-9), 2017-03-23
Supplement: 12859_2017_1536_MOESM1_ESM.pdf [file 12859_2017_1536_MOESM1_ESM.pdf]

# Supplementary Figures

## Network-Based Analysis of Transcriptional Profiles from Chemical Perturbations Experiments

F. Mulas, A. Li, D. Sherr, S. Monti

**Figure S1**

**Figure S2**

**Figure S3**

**Figure S4**

**Figure S5**

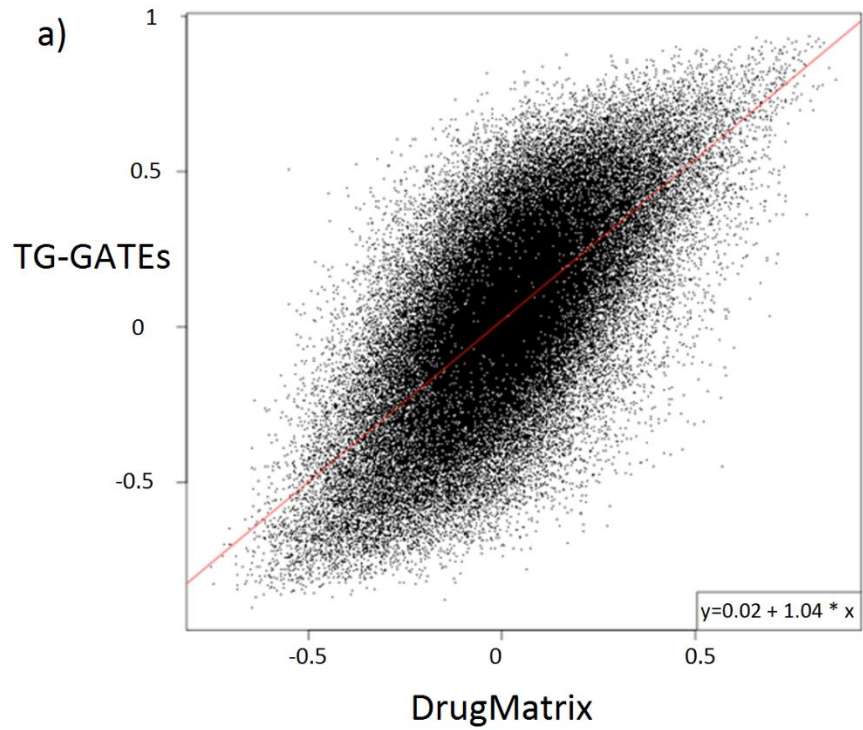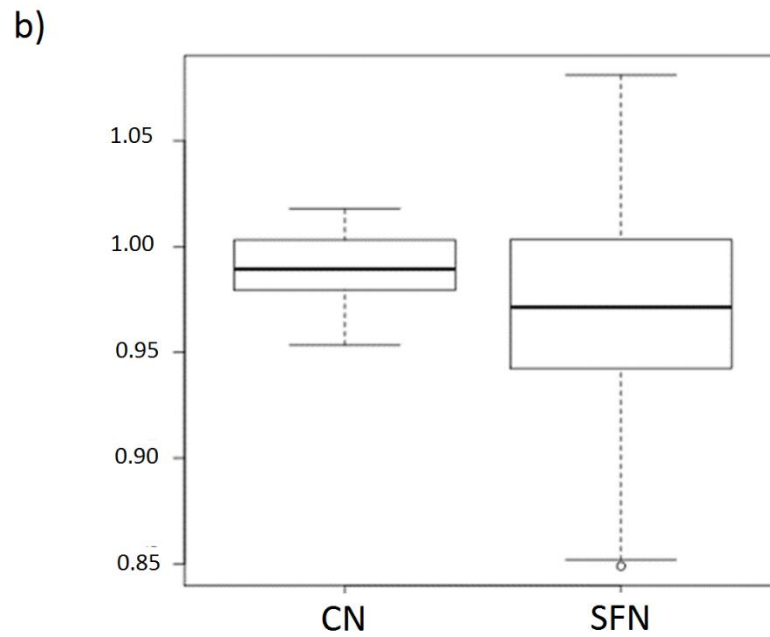

**Figures S1. Validation of network inference and comparison.** a. Ranges of gene correlation values in DrugMatrix and TG-GATEs datasets. b. Distribution of MDC values obtained comparing modules from the same data set (TG-GATEs) and conditions (liver control samples), using Scale-free approaches (SFN) or non-thresholded Correlation Networks (CN).

a)

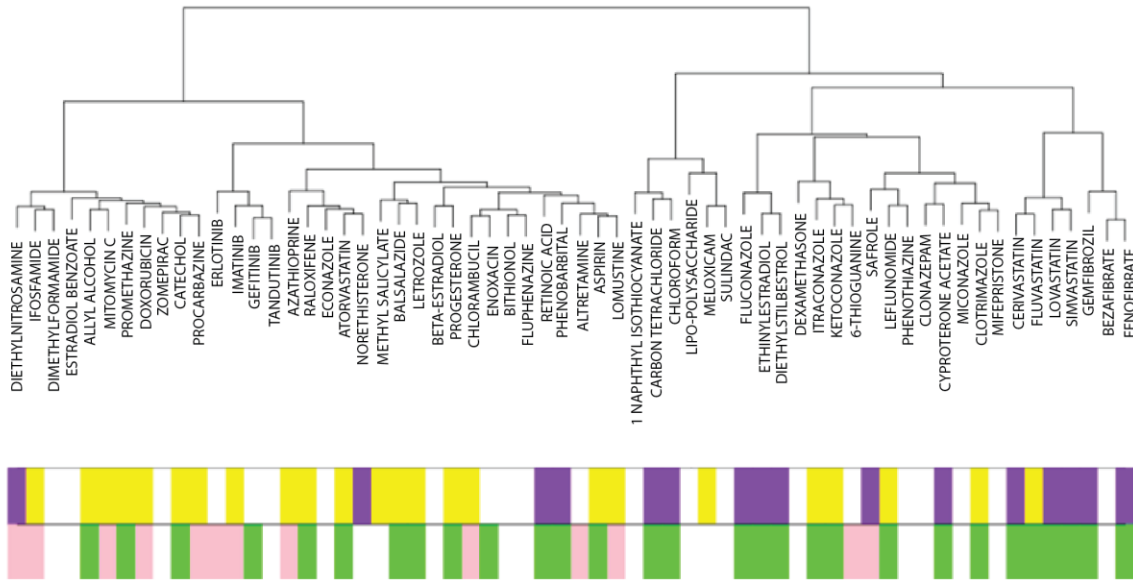

b)

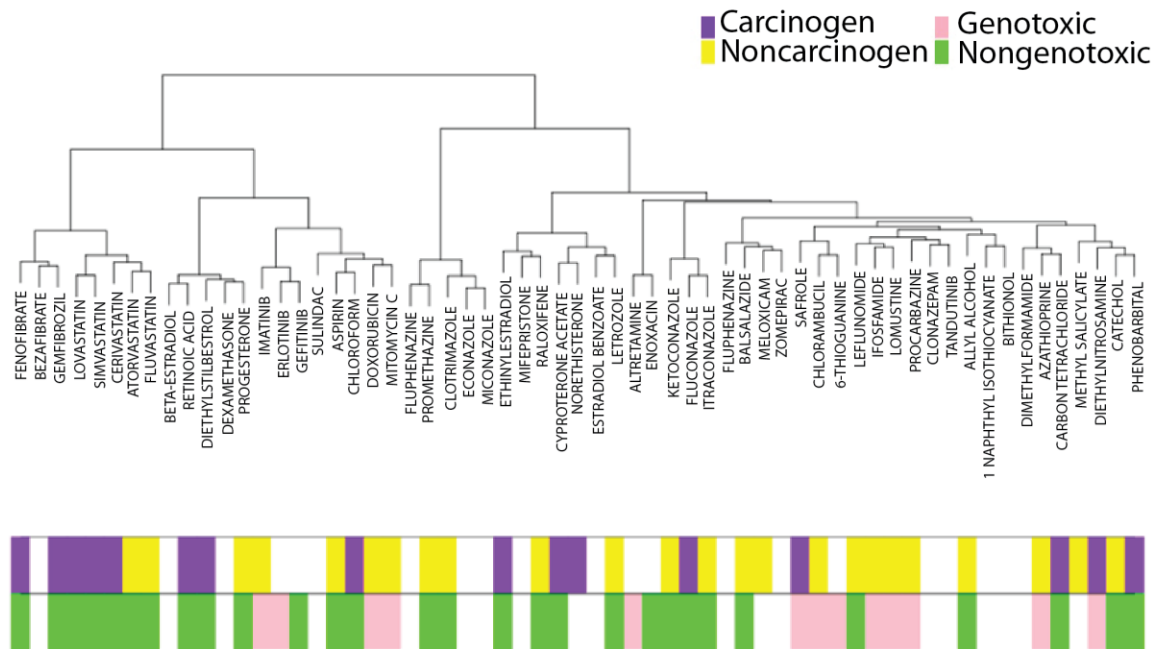

**Figure S2. Comparison with other grouping approaches.** Grouping of 62 compounds based on their average gene expression profile (a) or on their interacting proteins retrieved through public databases (b).

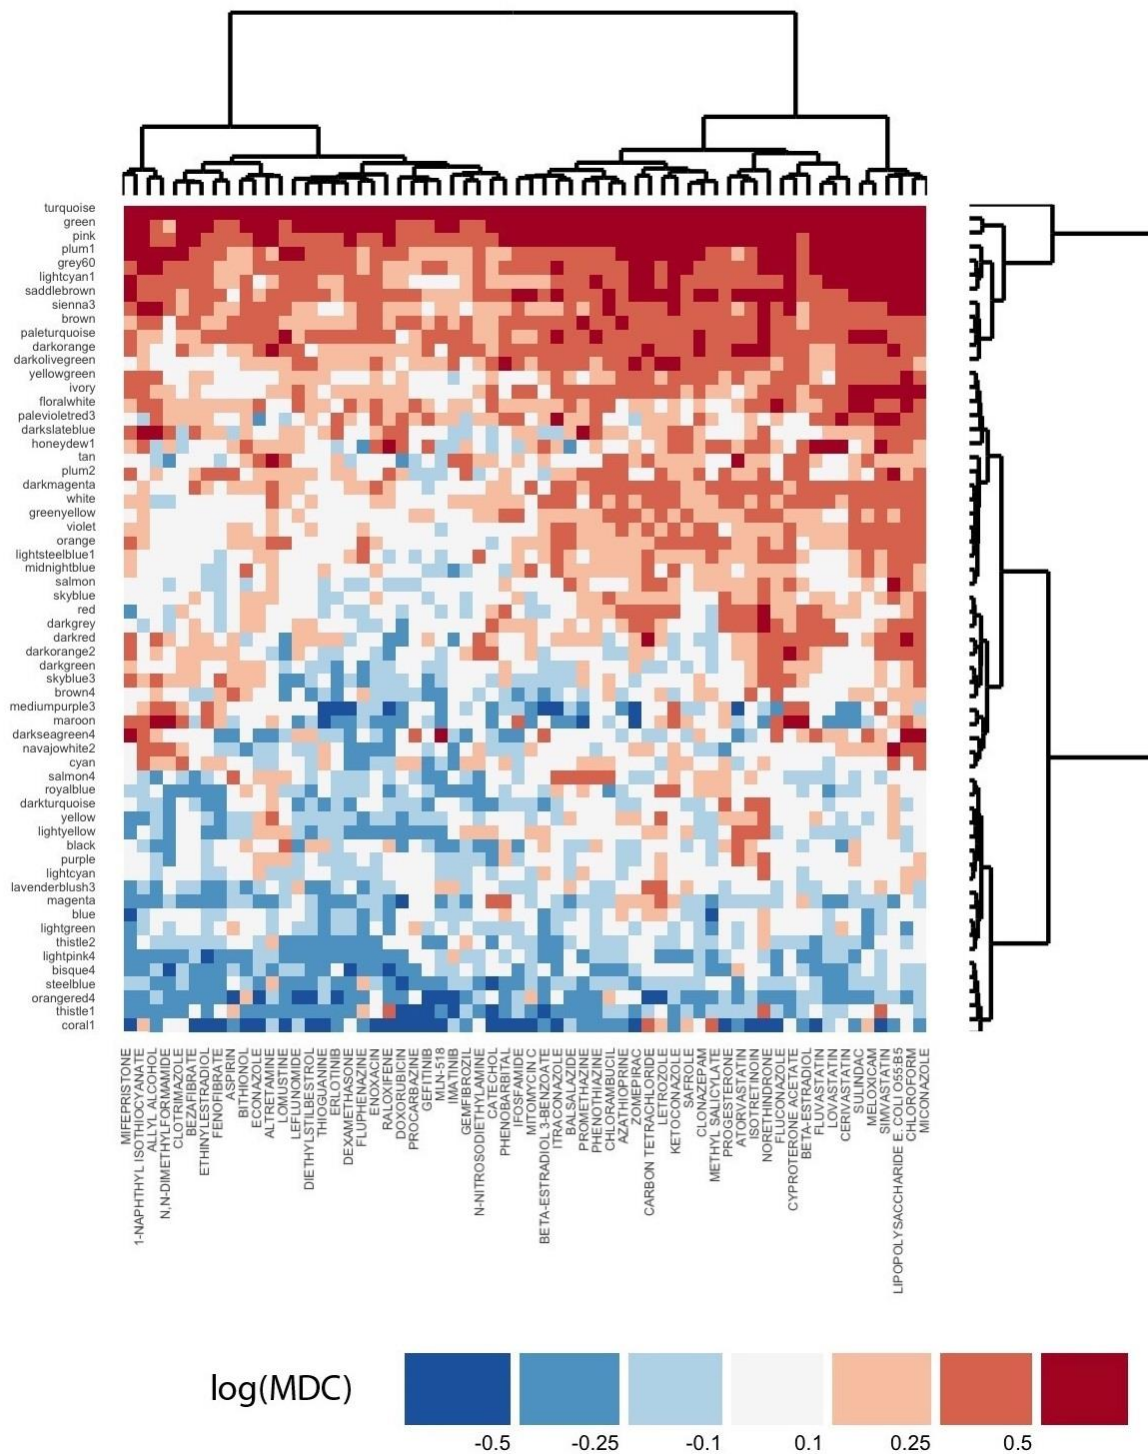

**Figure S3. Differential connectivity of Control modules in *Individual chemicals*-related networks.**

Differential connectivity of 60 Control modules (rows) induced by 62 chemical compounds (columns). **a.** MDC values, with blue and red indicating a loss and a gain of connectivity, respectively.

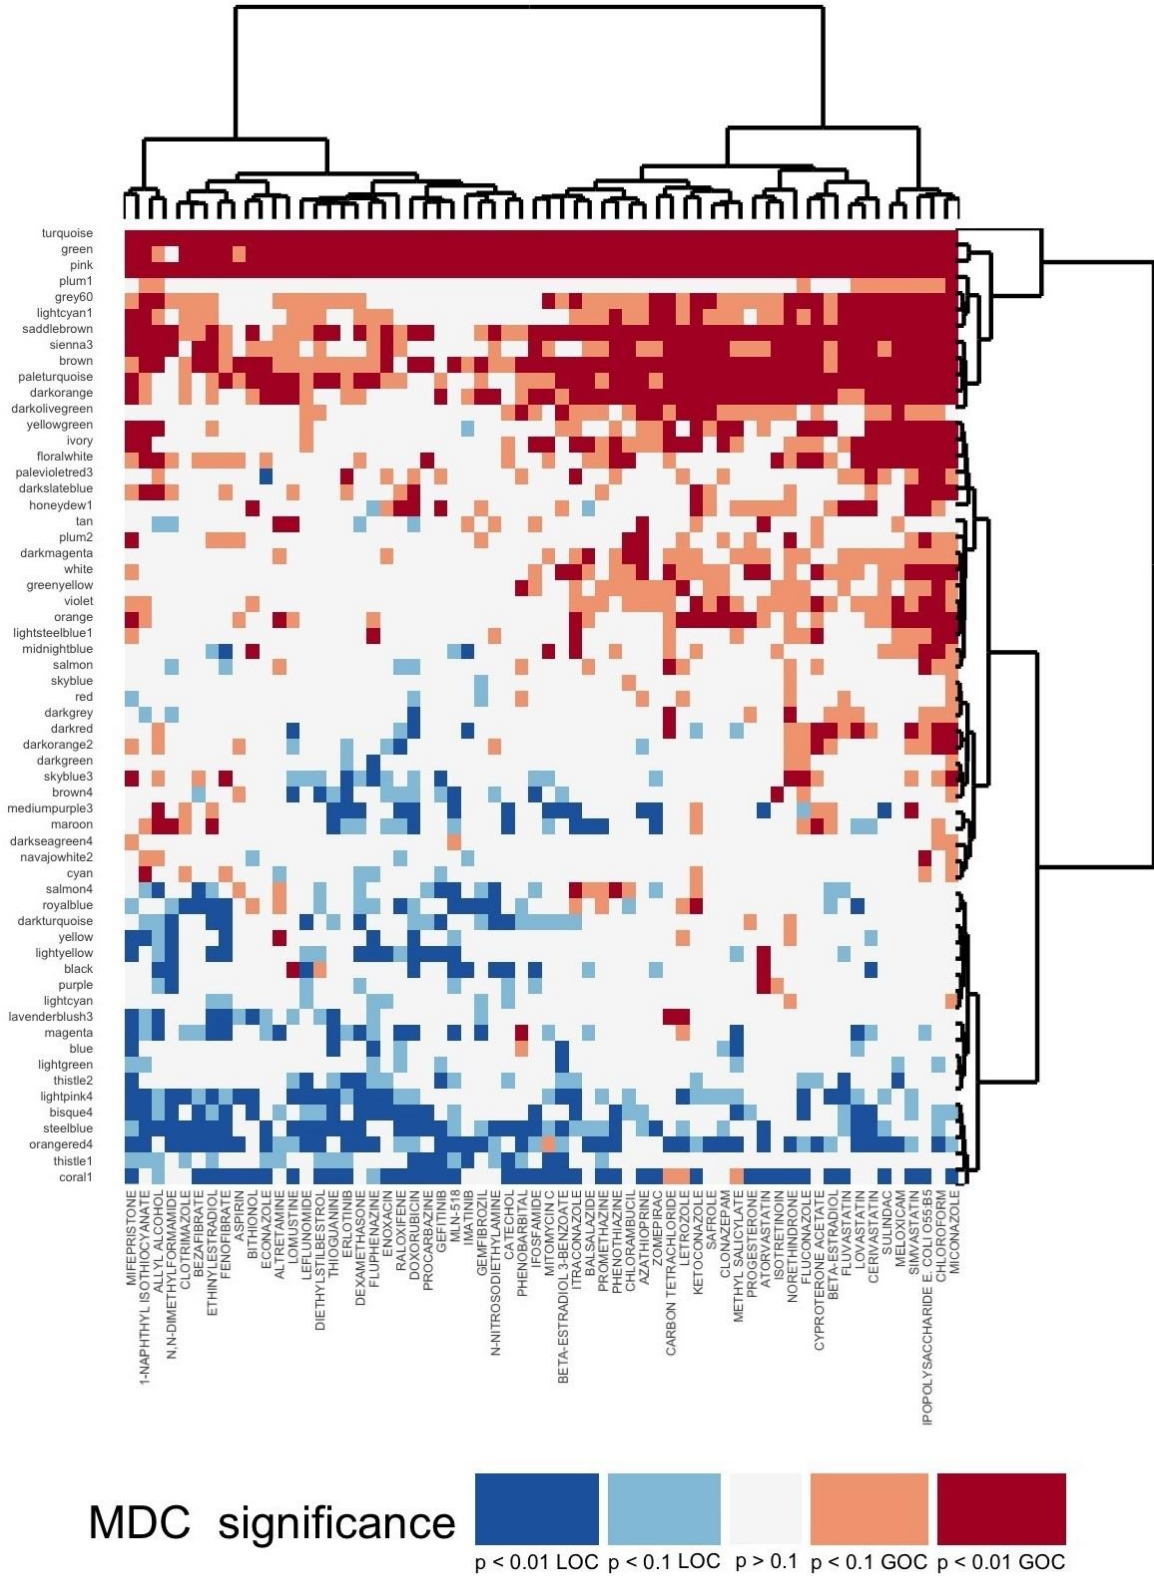

**Figure S3.b.** Significance level (q-values) of the module differential connectivity. Dark blue and dark red indicate more significant loss and gain of connectivity, respectively.



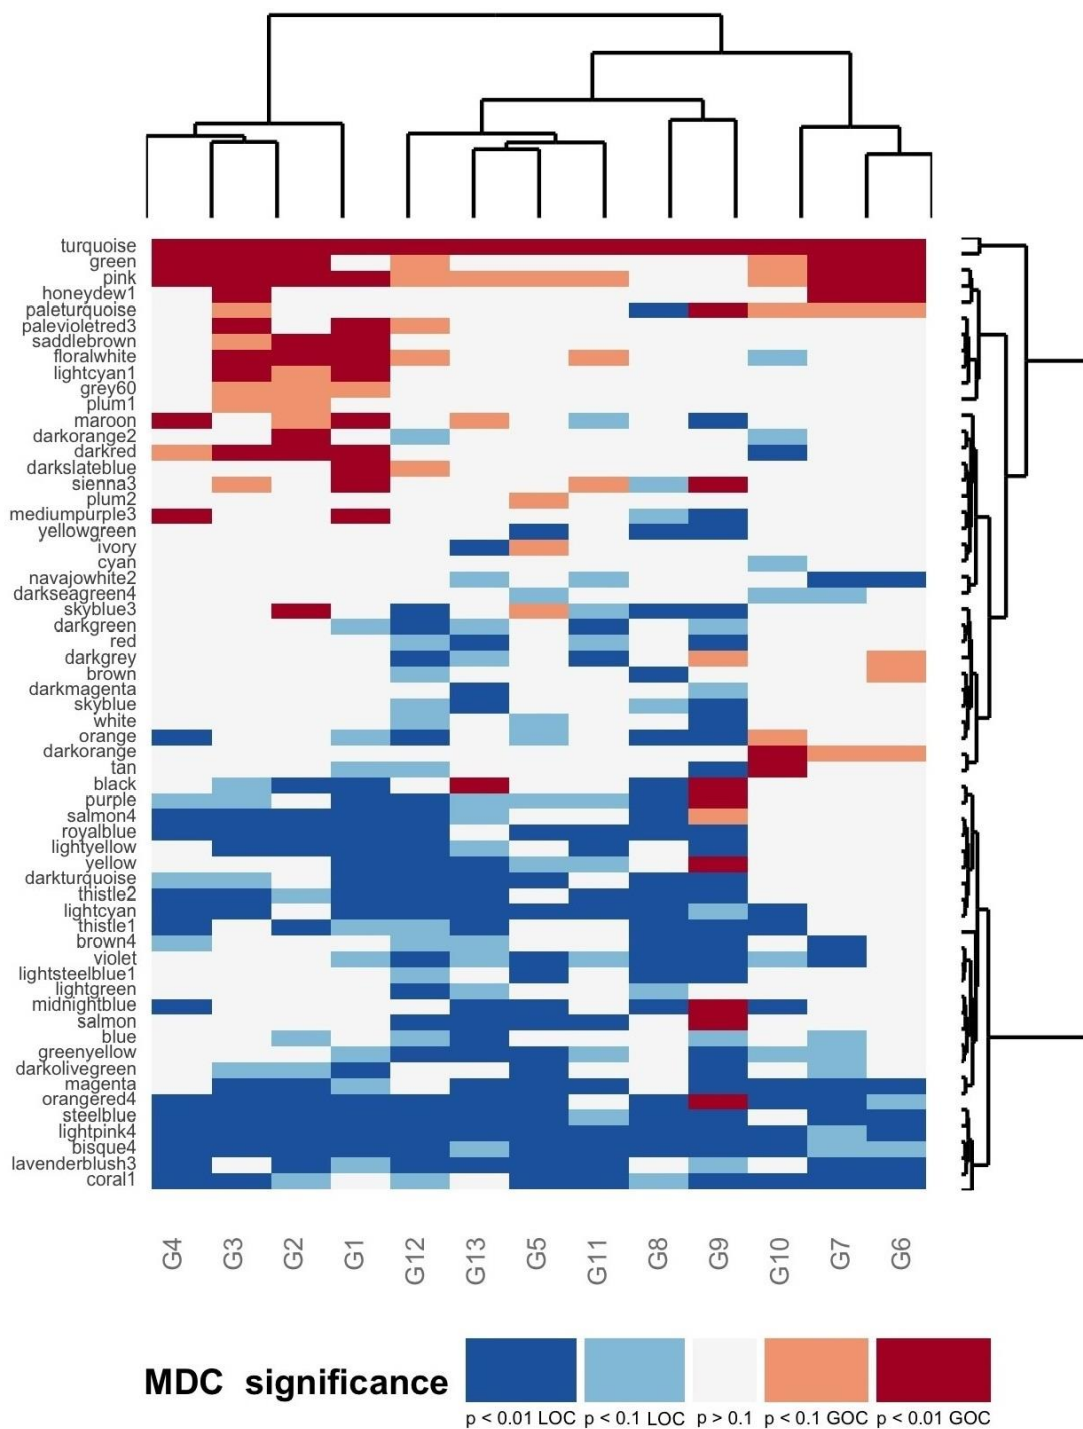

**Figure S4. Significance of MDC values in *Aggregate Compounds networks*.**

Significance of the differential connectivity values of 60 Control modules (rows) induced by 13 groups of compounds (columns). The heatmap is color-coded according to the significance level (q-values) of the corresponding MDC values. Dark blue and dark red indicate more significant loss and gain of connectivity, respectively.

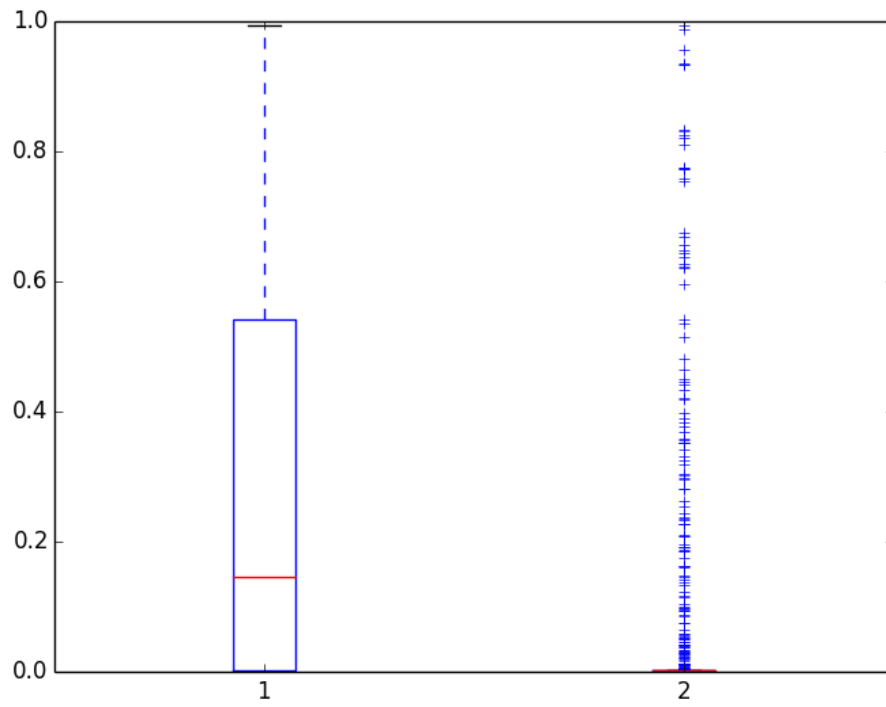

**Figure S5.** P-value distribution obtained with the bootstrap approach (1) and with a gene permutation strategy (2).
